# Supplementary material for: Nutrient Patterns and Risk of Osteopenia in Postmenopausal Women
Source: MDPI journal article supplement (doi:10.3390/nu15071670), 2023-03-29
Supplement: s1 [file s1]

**Table S1:** Distribution of means and frequency of sociodemographic, lifestyle, and clinical variables according to the nutrient patterns of postmenopausal women.

| VARIABLES                           | TERTILE OF NUTRIENT PATTERNS |            |             |         |            |            |            |         |            |            |            |         |
|-------------------------------------|------------------------------|------------|-------------|---------|------------|------------|------------|---------|------------|------------|------------|---------|
|                                     | NP 1                         |            |             |         | NP 2       |            |            |         | NP 3       |            |            |         |
|                                     | 1st T                        | 2nd T      | 3rd T       | p value | 1st T      | 2nd T      | 3rd T      | p value | 1st T      | 2nd T      | 3rd T      | p value |
|                                     | Mean ± SD                    |            |             |         |            |            |            |         |            |            |            |         |
| <b>Age (Years)</b>                  | 66.4 ± 6.4                   | 67.6 ± 5.4 | 66.8 ± 6.1  | 0.586   | 67.6 ± 7.0 | 66.2 ± 5.0 | 66.7 ± 6.2 | 0.601   | 67.1 ± 6.0 | 65.8 ± 5.7 | 67.7 ± 6.6 | 0.364   |
| <b>Time since menopause (Years)</b> | 18.8 ± 8.2                   | 20.2 ± 8.1 | 19.9 ± 10.2 | 0.766   | 20.7 ± 9.3 | 18.9 ± 7.2 | 19.3 ± 9.9 | 0.635   | 20.2 ± 8.6 | 17.9 ± 8.5 | 20.9 ± 9.3 | 0.265   |
| <b>BMI (kg/m<sup>2</sup>)</b>       | 26.7 ± 4.3                   | 26.6 ± 4.5 | 28.6 ± 5.0  | 0.091   | 27.2 ± 4.6 | 27.2 ± 4.7 | 27.4 ± 4.9 | 0.973   | 28.6 ± 4.9 | 26.9 ± 4.3 | 27.2 ± 4.7 | 0.082   |
|                                     | n (%)                        |            |             |         |            |            |            |         |            |            |            |         |
| <b>Age group (Years)</b>            |                              |            |             | 0.443   |            |            |            | 0.828   |            |            |            | 0.939   |
| 50.0 – 59.9                         | 5 (38.5)                     | 2 (15.4)   | 6 (46.2)    |         | 5 (38.5)   | 3 (23.1)   | 5 (38.5)   |         | 5 (38.5)   | 5 (38.5)   | 3 (23.1)   |         |
| 60.0 – 69.9                         | 26 (35.1)                    | 24 (32.4)  | 24 (32.4)   |         | 22 (29.7)  | 27 (36.5)  | 25 (33.8)  |         | 25 (33.8)  | 24 (32.4)  | 25 (33.8)  |         |
| ≥ 70.0                              | 10 (27.0)                    | 16 (43.2)  | 11 (29.7)   |         | 14 (37.8)  | 12 (32.4)  | 11 (29.7)  |         | 11 (29.7)  | 13 (35.1)  | 13 (35.1)  |         |
| <b>Color</b>                        |                              |            |             | 0.212   |            |            |            | 0.523   |            |            |            | 0.604   |
| White                               | 20 (42.6)                    | 14 (29.8)  | 13 (27.7)   |         | 18 (38.3)  | 16 (34.0)  | 13 (27.7)  |         | 13 (27.7)  | 17 (36.2)  | 17 (36.2)  |         |
| Non-white                           | 21 (27.3)                    | 28 (36.4)  | 28 (36.4)   |         | 23 (29.9)  | 26 (33.8)  | 28 (36.4)  |         | 28 (36.4)  | 25 (32.5)  | 24 (31.2)  |         |
| <b>Marital status</b>               |                              |            |             | 0.740   |            |            |            | 0.083   |            |            |            | 0.281   |
| Without partner                     | 18 (30.0)                    | 22 (36.7)  | 20 (33.3)   |         | 23 (38.3)  | 23 (38.5)  | 14 (23.3)  |         | 24 (40.0)  | 18 (30.0)  | 18 (30.0)  |         |
| With partner                        | 23 (35.9)                    | 20 (31.3)  | 21 (33.1)   |         | 18 (28.1)  | 19 (29.7)  | 27 (42.2)  |         | 17 (26.6)  | 24 (37.5)  | 23 (35.9)  |         |
| <b>Education level</b>              |                              |            |             | 0.531   |            |            |            | 0.079   |            |            |            | 0.619   |
| No schooling                        | 5 (45.5)                     | 2 (18.2)   | 4 (36.4)    |         | 6 (54.5)   | 5 (45.5)   | -          |         | 4 (36.4)   | 3 (27.3)   | 4 (36.4)   |         |
| Elementary school                   | 26 (34.7)                    | 28 (37.3)  | 21 (28.0)   |         | 25 (33.3)  | 22 (29.3)  | 28 (37.3)  |         | 28 (37.3)  | 23 (30.7)  | 24 (32.0)  |         |
| High school                         | 7 (25.9)                     | 10 (37.0)  | 10 (37.0)   |         | 9 (33.3)   | 9 (33.3)   | 9 (33.3)   |         | 6 (22.2)   | 10 (37.0)  | 11 (40.7)  |         |

|                               |           |           |           |       |           |           |           |       |           |           |           |       |
|-------------------------------|-----------|-----------|-----------|-------|-----------|-----------|-----------|-------|-----------|-----------|-----------|-------|
| University school             | 3 (27.3)  | 2 (18.2)  | 6 (54.5)  |       | 1 (9.1)   | 6 (54.5)  | 4 (36.4)  |       | 3 (27.3)  | 6 (54.5)  | 2 (18.2)  |       |
| <b>Employement status</b>     |           |           |           | 0.998 |           |           |           | 0.115 |           |           |           | 0.533 |
| Employed                      | 7 (33.3)  | 7 (33.3)  | 7 (33.3)  |       | 9 (42.9)  | 3 (14.3)  | 9 (42.9)  |       | 5 (23.8)  | 9 (42.9)  | 7 (33.3)  |       |
| Unemployed                    | 34 (33.0) | 35 (34.0) | 34 (33.0) |       | 32 (31.1) | 39 (37.9) | 32 (31.1) |       | 36 (35.0) | 33 (32.0) | 34 (33.0) |       |
| <b>Physical active level</b>  |           |           |           | 0.354 |           |           |           | 0.844 |           |           |           | 0.005 |
| Insufficiently active         | 21 (33.9) | 24 (38.7) | 17 (27.4) |       | 21 (33.9) | 22 (35.5) | 19 (30.6) |       | 24 (38.7) | 26 (41.9) | 12 (19.4) |       |
| Suficiently active            | 20 (32.3) | 18 (29.0) | 24 (38.7) |       | 20 (32.3) | 20 (32.3) | 22 (35.5) |       | 17 (27.4) | 16 (25.8) | 29 (46.8) |       |
| <b>Smoking</b>                |           |           |           | 0.870 |           |           |           | 0.123 |           |           |           | 0.529 |
| Smoker                        | 2 (33.3)  | 3 (50.0)  | 1 (16.7)  |       | 4 (66.7)  | 2 (33.3)  | -         |       | 3 (50.0)  | 1 (16.7)  | 2 (33.3)  |       |
| Non-smoker                    | 39 (33.1) | 39 (33.1) | 40 (33.9) |       | 37 (31.4) | 40 (33.9) | 41 (34.7) |       | 38 (32.2) | 41 (34.7) | 39 (33.1) |       |
| <b>Alcohol consumption</b>    |           |           |           | 0.643 |           |           |           | 0.128 |           |           |           | 0.442 |
| Consume                       | 6 (35.3)  | 7 (41.2)  | 4 (23.5)  |       | 7 (41.2)  | 8 (47.1)  | 2 (11.8)  |       | 5 (29.4)  | 8 (47.1)  | 4 (23.5)  |       |
| Do not consume                | 35 (32.7) | 35 (32.7) | 37 (34.6) |       | 34 (31.8) | 34 (31.8) | 39 (36.4) |       | 36 (33.6) | 34 (31.8) | 37 (34.6) |       |
| <b>Nutritional Status</b>     |           |           |           | 0.169 |           |           |           | 0.774 |           |           |           | 0.406 |
| Underweigth                   | 9 (42.9)  | 9 (42.9)  | 3 (14.3)  |       | 6 (28.6)  | 8 (38.1)  | 7 (33.3)  |       | 5 (23.8)  | 6 (28.6)  | 10 (47.6) |       |
| Normal weighth                | 15 (28.3) | 19 (35.8) | 19 (35.8) |       | 19 (35.8) | 19 (35.8) | 15 (28.3) |       | 14 (26.4) | 21 (39.6) | 18 (34.0) |       |
| Overweigth                    | 9 (50.0)  | 5 (27.8)  | 4 (22.2)  |       | 5 (27.8)  | 4 (22.2)  | 9 (50.0)  |       | 8 (44.4)  | 5 (27.5)  | 5 (27.8)  |       |
| Obese                         | 8 (25.0)  | 9 (28.1)  | 15 (46.9) |       | 11 (34.4) | 11 (34.4) | 10 (31.3) |       | 14 (43.8) | 10 (31.3) | 8 (25.0)  |       |
| <b>Ca supplementation</b>     |           |           |           | 0.640 |           |           |           | 0.765 |           |           |           | 0.640 |
| Yes                           | 29 (35.8) | 27 (33.3) | 25 (30.9) |       | 28 (34.6) | 28 (34.6) | 25 (30.9) |       | 25 (30.9) | 27 (33.3) | 29 (35.8) |       |
| No                            | 12 (27.9) | 15 (34.9) | 16 (37.2) |       | 13 (34.6) | 28 (34.6) | 16 (37.2) |       | 16 (37.2) | 15 (34.9) | 12 (27.9) |       |
| <b>Vit. D supplementation</b> |           |           |           | 0.716 |           |           |           | 0.339 |           |           |           | 0.587 |
| Yes                           | 25 (35.2) | 22 (31.0) | 24 (33.8) |       | 27 (38.0) | 21 (29.6) | 23 (32.4) |       | 23 (32.4) | 22 (31.0) | 26 (36.6) |       |

|                             |           |           |           |              |           |           |           |              |           |           |           |              |
|-----------------------------|-----------|-----------|-----------|--------------|-----------|-----------|-----------|--------------|-----------|-----------|-----------|--------------|
| No                          | 16 (30.2) | 20 (37.7) | 17 (32.1) |              | 14 (26.4) | 21 (39.6) | 18 (34.0) |              | 18 (34.0) | 20 (37.7) | 15 (28.3) |              |
| <b>Antiresorptive drugs</b> |           |           |           | <b>0.327</b> |           |           |           | <b>0.670</b> |           |           |           | <b>0.264</b> |
| Yes                         | 23 (39.7) | 17 (29.3) | 18 (31.0) |              | 21 (36.2) | 20 (34.5) | 17 (29.3) |              | 22 (37.9) | 21 (36.2) | 15 (25.9) |              |
| No                          | 18 (27.3) | 25 (37.9) | 23 (34.8) |              | 20 (30.3) | 22 (33.3) | 24 (36.4) |              | 19 (28.8) | 21 (31.8) | 26 (39.4) |              |
| <b>BMD</b>                  |           |           |           | <b>0.038</b> |           |           |           | <b>0.053</b> |           |           |           | <b>0.310</b> |
| Normal                      | 5 (18.5)  | 7 (25.9)  | 15 (55.6) |              | 5 (18.5)  | 8 (29.6)  | 14 (51.9) |              | 13 (48.1) | 7 (25.9)  | 7 (25.9)  |              |
| Osteopenia                  | 22 (42.3) | 19 (36.5) | 11 (21.2) |              | 19 (36.5) | 22 (42.3) | 11 (21.2) |              | 15 (28.8) | 21 (40.4) | 16 (30.8) |              |
| Osteoporosis                | 14 (31.1) | 16 (35.6) | 15 (33.3) |              | 17 (37.8) | 12 (26.7) | 16 (35.6) |              | 13 (28.9) | 14 (31.1) | 18 (40.0) |              |

ANOVA, post-hoc: Tukey. Qui-Square Test; Fischer's Exact Test. P values in bold:  $p < 0.05$ . NP1: Nutrient Pattern 1; NP2: Nutrient Pattern 2; NP3: Nutrient Pattern 3; 1st T: First Tertile; 2nd T: Second Tertile; 3rd T: Third Tertile. SD: standard deviation. BMI: Body Mass Index; BMD: Bone Mineral Density. Ca: Calcium; Vit. D: Vitamin D.
